# Supplementary material
Source: PubMed Central journal article supplement (PMC3579970)
Supplement: 11606_2012_2217_MOESM1_ESM.pdf [file 11606_2012_2217_MOESM1_ESM.pdf]

Table 1. Descriptive Statistics for Independent Variables

| Measure: brief description                                                                                                                                                                                                           | K  | Mean ± SD   | Range (ordinal scale) | Cronbach's Alpha |
|--------------------------------------------------------------------------------------------------------------------------------------------------------------------------------------------------------------------------------------|----|-------------|-----------------------|------------------|
| <i>Organizational Readiness for Change: Adequacy of resources</i>                                                                                                                                                                    |    |             |                       |                  |
| <b>Financial insufficiency:</b><br>Limited resources to support needed changes or mandated quality improvement changes                                                                                                               | 3  | 3.00 ± 0.77 | 1 – 5                 | 0.87             |
| <b>Space sufficiency:</b><br>Clinical space, administrative space, patient education space                                                                                                                                           | 5  | 2.97 ± 0.97 | 1 – 5                 | 0.87             |
| <b>Sufficiency for information technology (IT) support:</b><br>Sufficient computers, basic and advanced CPRS (Computerized Patient Record System) training, access to medical informatics support                                    | 4  | 1.86 ± 0.76 | 1 – 5                 | 0.78             |
| <b>Clinical provider insufficiency:</b><br>Insufficient primary care providers (MD, NP, PA), number of unfilled vacancies                                                                                                            | 6  | 1.86 ± 0.76 | 1 – 5                 | 0.67             |
| <i>Organizational Readiness for Change: Motivation for Change</i>                                                                                                                                                                    |    |             |                       |                  |
| <b>Retreat for depression guideline training</b>                                                                                                                                                                                     | 1  | 0.09*       | Yes/No*               | --†              |
| <b>Location in VA regional network that endorsed TIDES</b>                                                                                                                                                                           | 1  | 0.16        | Yes/No                | --               |
| <i>Organizational Readiness for Change: Staff Attributes</i>                                                                                                                                                                         |    |             |                       |                  |
| <b>Clinical champion for depression treatment</b>                                                                                                                                                                                    | 1  | 0.17        | Yes/No                | --               |
| <b>Presence of psychiatrist on PC staff</b>                                                                                                                                                                                          | 1  | 0.28        | Yes/No                | --               |
| <b>Presence of psychologist on PC staff</b>                                                                                                                                                                                          | 1  | 0.30        | Yes/No                | --               |
| <b>Presence of social worker on PC staff</b>                                                                                                                                                                                         | 1  | 0.76        | Yes/No                | --               |
| <i>Organizational Readiness for Change: Organizational climate</i>                                                                                                                                                                   |    |             |                       |                  |
| <b>Teamwork:</b><br>Teamwork in implementing clinical practice guidelines                                                                                                                                                            | 1  | 3.31 ± 0.94 | 1 – 5                 | --               |
| <b>Communication and cooperation:</b><br>Cooperation among physicians and administration, communication between physicians and nurses, cooperation between departments, culture of flexibility, patient complaints promptly resolved | 7  | 3.58 ± 0.58 | 1 – 5                 | 0.83             |
| <b>Orientation towards quality improvement (QI):</b><br>Use patient data to improve services, assess patient needs and satisfaction, efforts to improve work process                                                                 | 6  | 3.68 ± 0.62 | 1 – 5                 | 0.81             |
| <b>Competing demands and stress:</b><br>Clinicians and staff feel overwhelmed, constant change in practice, perceived stress, inability to make changes, hectic pace                                                                 | 10 | 3.29 ± 0.54 | 1 – 5                 | 0.87             |
| <b>Internal authority over primary care clinic:</b><br>Authority to set administrative policies, establish clinical procedures, and implement guidelines in primary care clinic                                                      | 3  | 2.86 ± 0.75 | 1 – 4                 | 0.92             |
| <b>External authority over relationship with subspecialists:</b><br>Authority over referral mechanisms, obtaining timely specialty consults, primary care contract services, obtaining additional resources                          | 4  | 2.22 ± 0.73 | 1 – 4                 | 0.84             |
| <b>Resistance:</b>                                                                                                                                                                                                                   | 3  | 2.82 ± 0.78 | 1 – 5                 | 0.90             |

| Measure: brief description                                                                | K | Mean ± SD | Range (ordinal scale) | Cronbach's Alpha |
|-------------------------------------------------------------------------------------------|---|-----------|-----------------------|------------------|
| Resistance among physicians, nurses, other providers for implementing clinical guidelines |   |           |                       |                  |

\* Measure is dichotomous and does not have SD.

† Measure is based on a single question and does not have a Cronbach's alpha.

Table 2. Survey items for scales used in this analysis

A. Adequacy of resources: Financial insufficiency

| To what extent do the following serve as barrier(s) to <i>improving performance</i> at your facility? | Proportion indicating <i>Large / Moderate</i> barrier |
|-------------------------------------------------------------------------------------------------------|-------------------------------------------------------|
| Limited financial resources to support needed changes                                                 | 58%                                                   |
| Limited ability to shift financial or human resources where most needed                               | 73%                                                   |
| In general, at your primary care program in the past year, to what extent:                            | Very Great / Great support                            |
| Was there sufficient financial support to implement mandated quality improvement changes              | 21%                                                   |

B. Adequacy of resources: Sufficiency of space

| How much of the time are the following types of <i>space, equipment and services</i> sufficient to meet your primary care program's needs | Proportion indicating <i>Completely/ Mostly</i> Sufficient |
|-------------------------------------------------------------------------------------------------------------------------------------------|------------------------------------------------------------|
| Administrative offices for <i>clinical</i> staff                                                                                          | 40%                                                        |
| Administrative offices for <i>support</i> personnel                                                                                       | 42%                                                        |
| Clinical space ( <i>i.e., size, layout, waiting rooms</i> )                                                                               | 37%                                                        |
| Number of exam rooms per provider                                                                                                         | 41%                                                        |
| Patient education space ( <i>e.g., classrooms, workstations, etc.</i> )                                                                   | 34%                                                        |

C. Adequacy of resources: Sufficiency of information technology support

| How much of the time are the following types of <i>space, equipment and services</i> sufficient to meet your primary care program's needs | Proportion indicating <i>Always / Usually</i> sufficient |
|-------------------------------------------------------------------------------------------------------------------------------------------|----------------------------------------------------------|
| Personal computers (PCs) or workstations                                                                                                  | 88%                                                      |

|                                                                                                                                                           |     |
|-----------------------------------------------------------------------------------------------------------------------------------------------------------|-----|
| CPRS training time in <i>basic functions</i> for <i>clinical providers (e.g., writing progress notes, charting functions)</i>                             | 51% |
| CPRS training time in <i>advanced functions</i> for <i>clinical providers (e.g., patient registries, tracking labs over time using graphing function)</i> | 28% |
| Access to medical informatics support                                                                                                                     | 39% |

D. Adequacy of resources: Clinical provider insufficiency

| <b>To what extent are the following types of <i>clinicians and support staff</i> sufficient to meet PC program goals?</b> | <b>Proportion indicating <i>Completely / Mostly sufficient</i></b> |
|---------------------------------------------------------------------------------------------------------------------------|--------------------------------------------------------------------|
| Generalist physicians (e.g. general internists, family medicine)                                                          | 65%                                                                |
| MDs in other specialties or subspecialties                                                                                | 20%                                                                |
| Nurse practitioners (NPs)                                                                                                 | 63%                                                                |
| Physicians Assistants                                                                                                     | 46%                                                                |
| <b>About how many unfilled vacancies do you have in your primary care program?</b>                                        |                                                                    |
| MDs                                                                                                                       | Mean 1.33<br>Std dev 1.65                                          |
| non-MDs                                                                                                                   | Mean 0.60<br>Std dev 1.05                                          |

E. Organizational climate: Communication and cooperation

| <b>In general, at your primary care program in the past year, to what extent:</b> | <b>Proportion indicating <i>Very Great / Great</i></b> |
|-----------------------------------------------------------------------------------|--------------------------------------------------------|
| Was there cooperation between physicians and senior administration                | 58%                                                    |
| Was there effective communication between physicians and nurses                   | 69%                                                    |
| Did the culture of your facility foster flexibility                               | 34%                                                    |
| Did the culture of your facility emphasize participative decision-making          | 34%                                                    |
| Was there cooperation between departments                                         | 39%                                                    |

| <b>Assessing the quality improvement orientation in your VA primary care program.</b>             | <b>Proportion indicating <i>Strongly Agree/ Agree</i></b> |
|---------------------------------------------------------------------------------------------------|-----------------------------------------------------------|
| Staff promptly resolve patient complaints                                                         | 49%                                                       |
| Patients' complaints are studied to identify patterns and prevent the same problem from recurring | 68%                                                       |

F. Organizational climate: Orientation towards quality improvement

| <b>We want to assess the quality improvement orientation in your VA primary care program.</b>           | <b>Proportion indicating <i>Strongly Agree/ Agree</i></b> |
|---------------------------------------------------------------------------------------------------------|-----------------------------------------------------------|
| Physicians are adequately recognized (non-financially) for improving quality                            | 49%                                                       |
| We make sure that we regularly take time to figure out ways to improve our work process                 | 67%                                                       |
| We use a wide range of data and information about the quality of care and services to make improvements | 85%                                                       |
| We use data from patients to improve services                                                           | 82%                                                       |
| The organization does a good job of assessing current patient needs and expectations                    | 56%                                                       |
| The organization uses data on customer expectations and/or satisfaction when designing new services     | 65%                                                       |

G. Organizational climate: Competing demands and stress

| <b>Do you agree or disagree with the following statements?</b>                                     | <b>Proportion indicating <i>Strongly Agree/ Agree</i></b> |
|----------------------------------------------------------------------------------------------------|-----------------------------------------------------------|
| It is hard to make any changes in this practice because we are so busy seeing patients             | 68%                                                       |
| The staff members of this practice very frequently feel overwhelmed by the work demands            | 79%                                                       |
| The clinicians in this practice very frequently feel overwhelmed by the work demands               | 81%                                                       |
| Practice experienced as "stressful"                                                                | 72%                                                       |
| This practice is almost always in chaos                                                            | 18%                                                       |
| Things have been changing so fast in our practice that it is hard to keep up with what is going on | 43%                                                       |

| To what extent do you think each of the following serves as a barrier to improving performance at your facility? | Proportion indicating Large/Moderate Barrier |
|------------------------------------------------------------------------------------------------------------------|----------------------------------------------|
| Insufficient numbers of primary care providers                                                                   | 51%                                          |
| Competing demands across too many initiatives                                                                    | 88%                                          |
| Describe the pace of your PC practice environment (% indicating hectic, chaotic)                                 | 58%                                          |
| Great deal/moderate stress (time pressures, external demand, dealing with patient) in PC clinic                  | 31%                                          |

H. Organizational climate: Internal authority over primary care clinic

| As a clinical leader, how much authority do you have in taking the following actions regarding your primary care program? | Proportion indicating Complete/ A Good Deal of authority |
|---------------------------------------------------------------------------------------------------------------------------|----------------------------------------------------------|
| Setting administrative policies for PC                                                                                    | 48%                                                      |
| Establishing clinical procedures for PC                                                                                   | 72%                                                      |
| Implementing guidelines pertinent to PC                                                                                   | 77%                                                      |

I. Organizational climate: External authority over relationships with specialists

| As a clinical leader, how much authority do you have in taking the following actions regarding your primary care program? | Proportion indicating Complete/ A Good Deal of authority |
|---------------------------------------------------------------------------------------------------------------------------|----------------------------------------------------------|
| Obtaining PC contract services                                                                                            | 31%                                                      |
| Establishing referral mechanisms                                                                                          | 48%                                                      |
| Establishing procedures for obtaining specialty consult results in a timely manner                                        | 37%                                                      |
| Obtaining additional resources for PC quality                                                                             | 35%                                                      |

J. Organizational climate: Resistance

| In the past year, when clinical guidelines were implemented in your facility, to what extent: | Proportion indicating Very Great/ Great |
|-----------------------------------------------------------------------------------------------|-----------------------------------------|
| Was there resistance from physicians?                                                         | 15.1%                                   |

|                                            |       |
|--------------------------------------------|-------|
| Was there resistance from nurses?          | 10.9% |
| Was there resistance from other providers? | 12.9% |
